# Supplementary material for: A pooled analysis of the cardiac events in the trastuzumab adjuvant trials
Source: Springer Nature journal article supplement (doi:10.1007/s10549-019-05453-z), 2019-10-11
Supplement: MOESM1 [file 17264696]

**Index**

Appendix 1 (Figure): Individual trial designs

Appendix 2 (Figure): Consort Diagram

Appendix 3 (Table): Individual trial cardiac event definitions

Appendix 4 (Table): Definitions for Acute Recovery and Recommendations for Interruption of Trastuzumab Treatment due to Cardiac Toxicity

Appendix 5 (Table): Individual trial cardiac follow up

Appendix 6 (Table): Definitions in programming algorithms

Appendix 7 (Table): Summary of Median Follow-Up Time

Appendix 8 (Table): Patient and Tumor Characteristics (Expanded)

Appendix 9 (Table): Incidence of Severe CHF and Cardiac Death (Trials Combined)

Appendix 10 (Table): Period of occurrence of cardiac events in relationship to trastuzumab use

Appendix 11 (Table): Incidence of Cardiac Event (Trastuzumab Sequential and Concurrent)

-------------------------------------------------------------------------------------------------------------------------------------

**Appendix 1 (Figure): Individual trial designs**

*See in separate file*

**
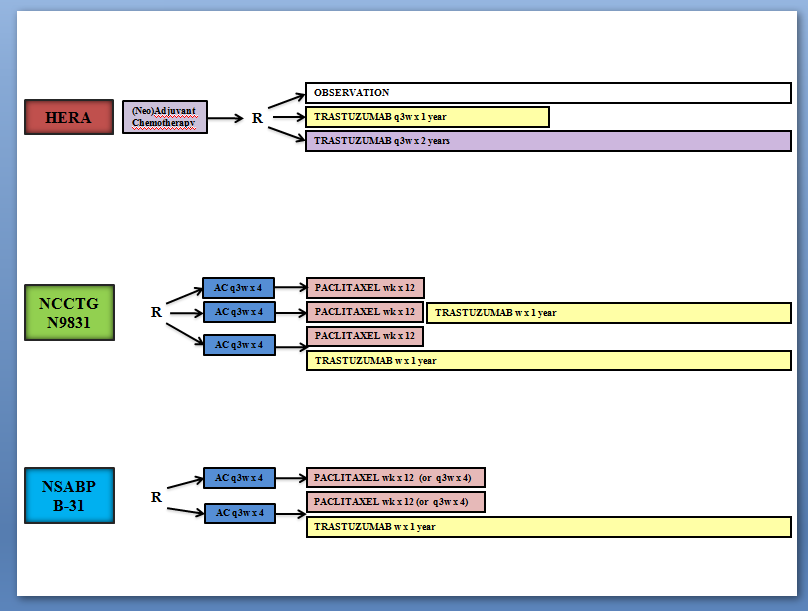
**

**Appendix 2 (Figure): Consort diagram**

NSABP B-31f

N9831i

HERAa

3505 patients randomized

1061 randomized to ACP

1058 randomized to ACPH

1698 randomized to observation

1703 randomized to 1 year trastuzumab

3129 eligible patients began AC treatment (all arms)j

1702 in ITT populationb

1055 in ITT populationg

1697 in ITT populationc

1944 patients began post AC treatment (all arms)j

1047 in ITT populationh

570 in Arm C: ACP and concomitant trastuzumab

710 in Arm B: ACP and sequential trastuzumab

664 in Arm A:

ACP

1717 in safety analysis populationd,e

1682 in safety analysis populationd

Combined Control Arm N=3428

Combined Trastuzumab Arm N=4017

a Cameron, D., Piccart-Gebhart, M.J., Gelber, R.D., Procter, M. et al. 11 years’ follow-up of trastuzumab after adjuvant chemotherapy in HER2-positive breast cancer: final analysis of the HERceptin Adjuvant (HERA) trial, *Lancet*, 389: 1195-1205, 2017

b 1 patient excluded from ITT population - no documentation of informed consent

c 1 patient excluded from ITT population - no documentation of informed consent

d 20 patients did not receive trastuzumab before recurrence

e The 884 patients who were randomized to observation and selectively crossed over to trastuzumab after the release of the trial results were censored at the time of selective crossover for the purpose of this analysis.

f Romond EH, Jeong J-H, Rastogi P, et al: Seven-Year Follow-Up Assessment of Cardiac Function in NSABP B-31, a Randomized Trial Comparing Doxorubicin and Cyclophosphamide Followed by Paclitaxel (ACP) With ACP Plus Trastuzumab As Adjuvant Therapy for Patients With Node-Positive, Human Epidermal Growth Factor Receptor 2-Positive Breast Cancer. J Clin Oncol 30:3792–3799, 2012

g 3 patients excluded from ITT population - no follow up

h 14 patients excluded from ITT population - no follow up

i Perez EA, Romond EH, Suman VJ, et al: Trastuzumab Plus Adjuvant Chemotherapy for Human Epidermal Growth Factor Receptor 2-Positive Breast Cancer: Planned Joint Analysis of Overall Survival From NSABP B-31 and NCCTG N9831. J Clin Oncol 32:3744–3752, 2014

j Advani PP, Ballman KV, Dockter TJ, et al: Long-Term Cardiac Safety Analysis of NCCTG N9831 (Alliance) Adjuvant Trastuzumab Trial. J Clin Oncol Off J Am Soc Clin Oncol , 2015

AC = doxorubicin and cyclophosomide

ACP = doxorubicin, cyclophosomide, and paclitaxel

ACPH = doxorubicin, cyclophosomide, paclitaxel, and trastuzumab

**Appendix 3 (Table): Individual trial cardiac event definitions**

| Study | Definition of Cardiac Event |
| --- | --- |
| HERA | Primary cardiac endpoints:   - Cardiac death, which was defined as death that definitely resulted from CHF, myocardial infarction, documented arrhythmia, or probable cardiac death within 24 hours of a cardiac event, - Severe CHF, which was defined as New York Heart Association (NYHA) class III or IV, confirmed by a cardiologist, and with a significant LVEF decrease.   Secondary cardiac endpoints:   - Confirmed significant LVEF decrease, defined as an absolute decline of at least 10 percentage points from baseline LVEF and a decline to less than 50% that is either asymptomatic (NYHA I) or mildly symptomatic (NYHA II). |
| NSABP B-31 | - Definite or probable cardiac death or - CHF manifested by dyspnoea with normal activity or at rest and associated with an absolute decrease in LVEF of greater than 10 percentage points from baseline to a value less than 55% or a decrease of more than 5% to a value below the lower limit of normal. |
| NCCTCG N9831 | - Symptomatic CHF, - Definite cardiac death (CD; as a result of myocardial infarction, CHF, or arrhythmia), - Probable CD (patient death without documented aetiology) |

**Appendix 4 (Table): Definitions for Acute Recovery from a Cardiac Event and Recommendations for Interruption of Trastuzumab Treatment due to Cardiac Toxicity**

| Study | Criteria for Acute Recovery | Criteria for Trastuzumab Interruption |
| --- | --- | --- |
| HERA | Two or more sequential LVEF assessments of 50% or  greater after the date of the cardiac event. | - Patients who experienced severe CHF - Patients with a confirmed significant LVEF decrease |
| NSABP B-31 | LVEF measurement of at least 50% | - Patients with symptomatic CHF - Patients with prespecified asymptomatic decreases in LVEF had to interrupt trastuzumab and be reevaluated in 4 weeks based on decrease in LVEF percentage points relative to baseline and decrease in LVEF percentage points from the lower limit of normal |
| NCTCG N9831 | LVEF recovery was defined as the return of LVEF to at least the normal value. | If LVEF decreased by greater than 15% points or to 10% to 15% points below the normal value (compared with registration LVEF), trastuzumab treatment was held. After repeat evaluation at 4 weeks, if the LVEF recovered, trastuzumab was resumed; if no recovery was noted, trastuzumab was discontinued. |

CHF: congestive heart failure; LVEF: Left ventricular ejection fraction decrease

**Appendix 5 (Table): Individual trial cardiac follow up**

| Trial | All Patients |
| --- | --- |
| HERA | Physical examination, a cardiac questionnaire, an electrocardiogram, and LVEF (ECHO or MUGA) at baseline and at months 3, 6, 12, 18, 24, 30, 36, and 48. Between years 5-10 cardiac monitoring with ECHO or MUGA was performed annually |
| NSABP B-31 | Cardiac history forms were to be submitted at entry, every 6 months for the first 5 years and yearly thereafter. MUGA scans were required in both treatment arms before entry, after chemotherapy, and at 6, 9, and 18 months. A cardiac report form and MUGA or ECHO (if applicable) were required 14 days after symptoms suggesting CHF or a definitive or probably cardiac death. This prompted a detailed cardiac review of the event. This process was continued during follow-up. Additional MUGA scans could be performed at investigator discretion. |
| NCCTG N9831 | MUGA or ECHO to evaluate LVEF was performed at baseline (within 3 weeks before registration), at 3, 6, and 9 months after registration, and after completion of chemotherapy (18 months for arms A and C and 21 months for arm B). Thereafter, LVEF evaluation by MUGA or ECHO was performed on year 6. Moreover, patients were observed for clinical cardiac events yearly after completion of the assigned treatment. |

FU: Follow Up, ECHO: Echocardiogram, MUGA: multigated acquisition scan, LVEF: left ventricular ejection fraction

**Appendix 6 (Table): Definitions in programming algorithms**

| **Summary Table** | **Definitions in Programming Algorithm** |
| --- | --- |
| Table 2: Summary of Discontinuation of Trastuzumab | HERA:  Patients are identified as having discontinued trastuzumab for safety reasons if the reason for not completing trastuzumab was reported as 'AE/INT. ILLNESS' or 'Death'  Patients are identified as having discontinued trastuzumab due to cardiac safety reasons if: the reason for not completing trastuzumab was reported as 'AE/INT. ILLNESS' or 'Death' and the adverse event leading to discontinuation of treatment is in the superclass term 'CARDIAC DISORDERS' or 'INVESTIGATIONS'  NSABP B31:  Reason for discontinuation of trastuzumab as indicated in the analysis dataset for NSABP B31 provided  N9831:  Patients in Arm B are identified as having discontinued trastuzumab due to safety reasons if the reason for not completing the third phase of the study is recorded as "toxicity" or "death on study".  Patients in Arm C are identified as having discontinued trastuzumab due to safety reasons if the reason for not completing the second phase (chemotherapy + trastuzumab) or the third phase (trastuzumab) is recorded as "toxicity" or "death on study".  Patients are identified as having discontinued trastuzumab due to cardiac safety reasons if: the reason for not completing trastuzumab was identified as safety reasons and the patient is identified as having any cardiac event (cardiac death, severe CHF, or asymptomatic or mildly symptomatic) |
| Table 3: Incidence of Cardiac Events in the Trastuzumab Arm by Trial | All:  Asymptomatic or mildly symptomatic cardiac events are only counted for patients who have not experienced a primary cardiac event (severe CHF or cardiac death).  NSABP B31:  The definition of a cardiac event in the protocol could be considered as cardiac death or severe CHF (NYHA class III/IV). For the cardiac TOG project, patients in trastuzumab arm of NSABP B31 who discontinued trastuzumab as a result of asymptomatic declines in LVEF are considered as having asymptomatic or mildly symptomatic CHF. The timing of the asymptomatic or mildly symptomatic CHF from randomization is set as the timing of last administration of trastuzumab or, for patients who did not start trastuzumab, as the last administration of chemotherapy.    N9831:  The definition of a cardiac event in the protocol could be considered as cardiac death or severe CHF (NYHA class III/IV). For the cardiac TOG project, patients in trastuzumab arms of N9831 who discontinued trastuzumab as a result of asymptomatic declines in LVEF are considered as having asymptomatic or mildly symptomatic CHF during the trastuzumab treatment period. The date of the cardiac event cannot be precisely identified but the timing can be approximated from the date of the LVEF assessment at the time of the patient decision to stop trastuzumab treatment.  For 6 patients, the approximation of the date of the cardiac event is unclear and the date of the cardiac event is unavailable.  There are 5 patients in the concurrent arm (Arm C) who have the reason for not completing the second phase of the trial (chemotherapy + trastuzumab) recorded as toxicity but have the third phase of the trial (trastuzumab) marked as complete. These 5 patients are considered as completing trastuzumab treatment. |
| Table 4: Summary of Incidence of Any Cardiac Event by Risk Factor (Trastuzumab Arms Combined) | All:  Patients where a screening LVEF was below the lower limit of normal (protocol deviation) are not considered in the "Screening LVEF" section.  Patients identified as having only right-sided radiotherapy are not considered in the "Previous Radiotherapy" section.  HERA:  Patients with a risk factor of diabetes are identified from the Other previous or current diseases other than primary breast cancer and cardiovascular diseases on CRF page 20. A patient is identified as having a risk factor of diabetes if any of other following other previous or conditions are reported on the CRF page:  “DIABETES MELLITUS”, “DIABETES MELLITUS INSULIN-DEPENDENT”, “DIABETES MELLITUS NON-INSULIN-DEPENDENT”, “DIABETIC NEPHROPATHY”, “DIABETIC RETINOPATHY”, “GESTATIONAL DIABETES”, “GLUCOSE TOLERANCE IMPAIRED”, “HYPERGLYCAEMIA”, “INSULIN RESISTANCE”  Patients with left-sided radiotherapy are identified from patients where the site of radiotherapy is specified as "LEFT" or "L+R" |
| Figure 1 Cumulative Incidence Plot of Any Cardiac Event in the Combined Trastuzumab Arm Based on Competing Risks | For reference see Kablfleisch JD and Prentice RL; The Statistical Analysis of Failure Time Data; Wiley; 2002 (2nd edition), Chapter 8*.  The competing risk is a DFS event.  The following risk factors were considered: (i) lower screening LVEF (lower limit <= LVEF < 60%); (ii) hypertension (yes); (iii) high BMI (> 25); (iv) older age (>= 60)  Patients in the combined trastuzumab arm were divided into 3 subgroups: (i) 0-1 risk factors, (ii) 2 risk factors, (iii) 3-4 risk factors, similarly to Hershman et al. (2018)*.  There were 6 patients in N9831 excluded from the analysis because the approximation of the timing of the event is asymptomatic or mildly symptomatic CHF is unclear.  There were 18 patients excluded from the analysis because of the protocol deviation that the screening LVEF was below the lower limit of normal.  For patients with a primary cardiac event (severe CHF or cardiac death), the date of the primary cardiac event is used as the date of the cardiac event.  * Kalbfleisch, J. D. and Prentice, R. L. (2002). *The Statistical Analysis* of *Failure Time Data 2nd edition*, John Wiley & Sons Inc., Hoboken  Hershman DL, Till C, Shen S, et al (2018). Association of cardiovascular risk factors with cardiac events and survival outcomes among patients with breast cancer enrolled in SWOG clinical trials. Journal of Clinical Oncology 36:2710-2717. |
| Figure 2 Mean LVEF Value Over Time | LVEF assessments for patients in trastuzumab arms were considered. The LVEF values by echocardiography were considered as well as LVEF values by MUGA scan. The mean LVEF value and 95% confidence interval for the mean LVEF value were calculated by study visit.  HERA:  The HERA protocol allowed LVEF assessments by echo or MUGA.  For HERA, there are some patients with more than one screening LVEF assessment. There are also some patients with a scheduled LVEF recorded by both echo and MUGA. In order to calculate change from baseline using a consistent method (MUGA or ECHO), a choice must be made on which data to use for a patient.  In identifying scheduled LVEF assessments, unknown LVEF values (recorded as NA, ND, NE, NK) and LVEF values recorded as a range are not considered.  NSABP B31:  When more than one LVEF assessment took place in the time window for a scheduled LVEF assessment, consider the earliest LVEF assessment in the time window as the scheduled LVEF assessment.  The time window (from randomization) for a scheduled LVEF assessment was the time of the scheduled LVEF assessment +/- 1 month  (e.g. LVEF assessments in the time window > 2 months and < 4 months from randomization are in the time window for the Month 3 LVEF)  N9831:  Scheduled LVEF assessments as indicated in the analysis dataset for NSABP N9831 provided |

**Appendix 7 (Table): Summary of Median Follow-Up Time**

|  | Trials Combined | HERA | NSABP B-31 | N9831 |
| --- | --- | --- | --- | --- |
|  |  |  |  |  |
| All Patients | N=7445 | N=3399 | N=2102 | N=1944 |
| Median follow-up time (months)* | 127.2 | 122.4 | 119.2 | 137.2 |
| IQR | 97.9, 139.1 | 29.9, 134.3 | 102.1, 133.9 | 125.1, 151.3 |
| Trastuzumab Arm | N=4017 | N=1682 | N=1055 | N=1280 |
| Median follow-up time (months)* | 132.0 | 132.3 | 120.6 | 137.0 |
| IQR | 119.9, 142.6 | 121.3, 138.9 | 102.8, 133.9 | 124.7, 151.8 |

* Median calculated by the reverse censoring method

IQR = interquartile range

**Appendix 8 (Table): Patient and Tumor Characteristics (Expanded)**

|  | Trials Combined | | HERA | | NSABP B-31 | | N9831 | |
| --- | --- | --- | --- | --- | --- | --- | --- | --- |
|  | Trastuzumab N=4017 | Control N=3428 | Trastuzumab N=1682 | Control N=1717 | Trastuzumab N=1055 | Control N=1047 | Trastuzumab N=1280 | Control N=664 |
| SCREENING LVEF* |  |  |  |  |  |  |  |  |
| Lower limit ≤LVEF < 60% | 1026 (25.5%) | 846 (24.7%) | 378 (22.5%) | 381 (22.2%) | 296 (28.1%) | 284 (27.1%) | 352 (27.5%) | 181 (27.3%) |
| ≥60% | 2973 (74.0%) | 2558 (74.6%) | 1290 (76.7%) | 1317 (76.7%) | 756 (71.7%) | 758 (72.4%) | 927 (72.4%) | 483 (72.7%) |
| 60% ≤LVEF < 65% | 1181 (29.4%) | 1013 (29.6%) | 544 (32.3%) | 531 (30.9%) | 285 (27.0%) | 290 (27.7%) | 352 (27.5%) | 192 (28.9%) |
| LVEF ≥65% | 1792 (44.6%) | 1545 (45.1%) | 746 (44.4%) | 786 (45.8%) | 471 (44.6%) | 468 (44.7%) | 575 (44.9%) | 291 (43.8%) |
| PREVIOUS RADIOTHERAPY |  |  |  |  |  |  |  |  |
| Left sided | 1537 (38.3%) | 1337 (39.0%) | 676 (40.2%) | 690 (40.2%) | 372 (35.3%) | 378 (36.1%) | 489 (38.2%) | 269 (40.5%) |
| None | 934 (23.3%) | 844 (24.6%) | 375 (22.3%) | 420 (24.5%) | 259 (24.5%) | 271 (25.9%) | 300 (23.4%) | 153 (23.0%) |
| HYPERTENSION |  |  |  |  |  |  |  |  |
| Yes | 729 (18.1%) | 634 (18.5%) | 296 (17.6%) | 307 (17.9%) | 216 (20.5%) | 213 (20.3%) | 217 (17.0%) | 114 (17.2%) |
| No | 3282 (81.7%) | 2784 (81.2%) | 1386 (82.4%) | 1410 (82.1%) | 833 (79.0%) | 824 (78.7%) | 1063 (83.0%) | 550 (82.8%) |
| HIGH BODY MASS INDEX |  |  |  |  |  |  |  |  |
| >25 | 2338 (58.2%) | 1973 (57.6%) | 846 (50.3%) | 846 (49.3%) | 642 (60.9%) | 668 (63.8%) | 850 (66.4%) | 459 (69.1%) |
| 20 ≤BMI ≤25 | 1412 (35.2%) | 1238 (36.1%) | 706 (42.0%) | 736 (42.9%) | 370 (35.1%) | 333 (31.8%) | 336 (26.3%) | 169 (25.5%) |
| SMOKING STATUS |  |  |  |  |  |  |  |  |
| Yes | 349 (8.7%) | 330 (9.6%) | 240 (14.3%) | 229 (13.3%) | 109 (10.3%) | 101 (9.6%) | Not available | Not available |
| No | 2380 (59.2%) | 2424 (70.7%) | 1442 (85.7%) | 1488 (86.7%) | 938 (88.9%) | 936 (89.4%) | Not available | Not available |
| DIABETES |  |  |  |  |  |  |  |  |
| Yes | 80 (2.0%) | 66 (1.9%) | 37 (2.2%) | 29 (1.7%) | 43 (4.1%) | 37 (3.5%) | Not available | Not available |
| No | 2651 (66.0%) | 2689 (78.4%) | 1645 (97.8%) | 1688 (98.3%) | 1006 (95.4%) | 1001 (95.6%) | Not available | Not available |
| RACE |  |  |  |  |  |  |  |  |
| Caucasian | 3374 (84.0%) | 2847 (83.1%) | 1404 (83.5%) | 1432 (83.4%) | 882 (83.6%) | 858 (81.9%) | 1088 (85.0%) | 557 (83.9%) |
| Non-Caucasian | 639 (15.9%) | 579 (16.9%) | 278 (16.5%) | 285 (16.6%) | 169 (16.0%) | 187 (17.9%) | 192 (15.0%) | 107 (16.1%) |

* The LVEF eligibility criteria was not consistent across the trials

LVEF = left ventricular ejection fraction

**Appendix 9:** **Incidence of Severe CHF and Cardiac Death (Trials Combined)**

|  | Trastuzumab Arms Combined N=4017 | Control Arms Combined N=3428 |
| --- | --- | --- |
| Cardiac death | 7 (0.2%) | 5 (0.1%) |
| Severe CHF (NYHA class III/IV) | 94 (2.3%) | 28 (0.8%) |

NOTE: The precise definition of the types of cardiac event was not consistent across the trials

NYHA = New York Heart Association

**Appendix 10 (Table): Period of occurrence of cardiac events in relationship to trastuzumab use**

|  | Trastuzumab Arms Combined N=4017 |
| --- | --- |
| Any cardiac event* | n= 452 |
| Did not start trastuzumab | 51 (11.3%) |
| During trastuzumab treatment** | 353 (78.1%) |
| After trastuzumab treatment | 48 (10.6%) |
| Severe CHF (NYHA class III/IV) | n= 94 |
| Did not start trastuzumab | 3 (3.2%) |
| During trastuzumab treatment** | 71 (75.5%) |
| After trastuzumab treatment | 20 (21.3%) |
| Asymptomatic or mildly symptomatic (NYHA class II) | n= 351 |
| Did not start trastuzumab | 46 (13.1%) |
| During trastuzumab treatment** | 281 (80.1%) |
| After trastuzumab treatment | 24 (6.8%) |

* The precise definition of the types of cardiac event was not consistent across the trials

** During trastuzumab treatment includes up to 28 days after last administration of trastuzumab

In NSABP B31, the timing of the asymptomatic or mildly symptomatic CHF from randomization is set as the timing of last administration of trastuzumab or, for patients who did not start trastuzumab, as the last administration of chemotherapy.

The precise date of asymptomatic or mildly symptomatic CHF in N9831 could not be determined.

The timing can be approximated from the patient decision to stop trastuzumab treatment.

NYHA = New York Heart Association

**Appendix 11 (Table): Incidence of Cardiac Event (Trastuzumab Sequential and Concurrent)**

|  | Trastuzumab Arms Combined  N=4017 | Trastuzumab Sequential N=2392 | Trastuzumab Concurrent N=1625 |
| --- | --- | --- | --- |
| Any cardiac event* | 452 (11.3%) | 165 (6.9%) | 287 (17.7%) |
| Cardiac death | 7 (0.2%) | 4 (0.2%) | 3 (0.2%) |
| Severe CHF (NYHA class III/IV) | 94 (2.3%) | 34 (1.4%) | 60 (3.7%) |
| Asymptomatic or mildly symptomatic (NYHA class II) | 351 (8.7%) | 127 (5.3%) | 224 (13.8%) |

* The precise definition of the types of cardiac event was not consistent across the trials

NYHA = New York Heart Association
